# Supplementary material for: Reducing hot carrier cooling rate in metal halide perovskites through lead vacancies: time-domain ab initio analysis
Source: Royal Society of Chemistry journal article supplement (doi:10.1039/d4qi00833b), 2024-01-01

## Supporting Information

### Reducing Hot Carrier Cooling Rate in Metal Halide Perovskites Through Lead Vacancies: Time-domain Ab Initio Analysis

Junguang Hu,<sup>1</sup> Ning Li,<sup>1</sup> Junping Xie,<sup>2</sup> Yong Pei,<sup>2</sup> Oleg V. Prezhdo,<sup>3\*</sup> and Wei Li<sup>1\*</sup>

<sup>1</sup>School of Chemistry and Materials Science, Hunan Agricultural University, Changsha, PR China

<sup>2</sup>Department of Chemistry, Key Laboratory of Environmentally Friendly Chemistry and Applications of Ministry of Education, Xiangtan University, Xiangtan 411105, China

<sup>3</sup>Department of Chemistry, University of Southern California, Los Angeles, California 90089, United States

---

\*Corresponding authors: [weili@hunau.edu.cn](mailto:weili@hunau.edu.cn) (W.L.); [prezhdo@usc.edu](mailto:prezhdo@usc.edu) (O.V.P.)

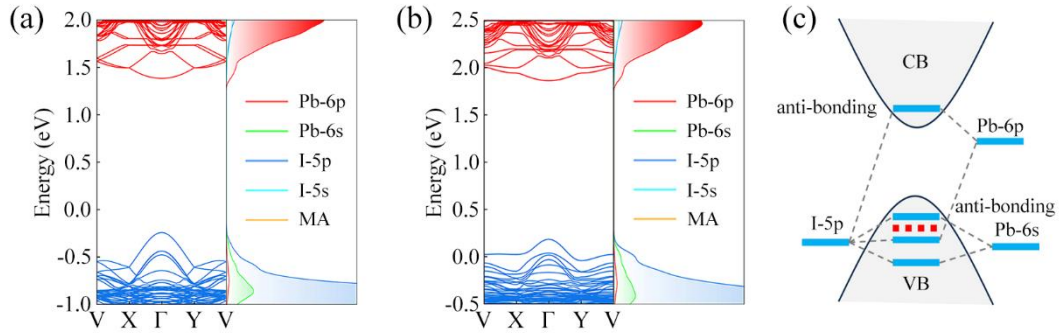

**Figure S1.** Band structure and projected density of states (PDOS) for pristine MAPbI<sub>3</sub> (a) and MAPbI<sub>3</sub> with a Pb vacancy (b). Schematic diagram of bonding and antibonding orbitals of MAPbI<sub>3</sub> perovskite (c). VBM and CBM are mainly formed from the Pb 6p orbital and antibonding coupling of the Pb 6s and I 5p orbitals, respectively. Pb vacancies do not generate mid-gap states within the bandgap; instead, they introduce intra-band states (dashed line) within the valence band.

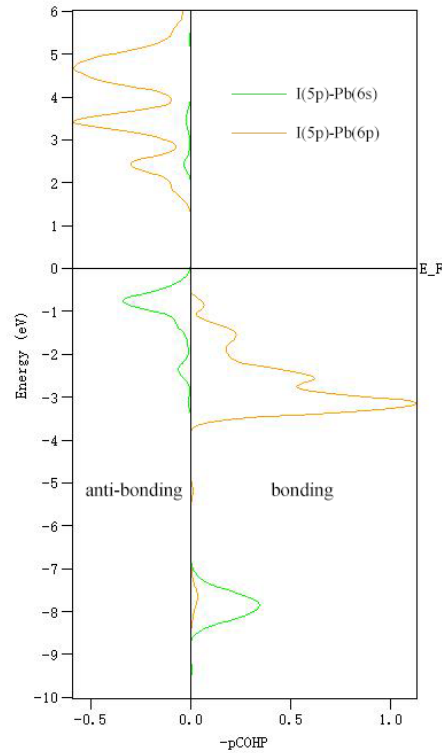

**Figure S2.** The orbital-resolved crystal orbital Hamiltonian population (-pCOHP) analysis of MAPbI<sub>3</sub> perovskite based on the 0K structure. The negative, zero, and positive values of -pCOHP correspond to the antibonding, nonbonding, and bonding characters, respectively.

**Table S1.** The Pb-I bond length (Å) and Pb-I-Pb bond angle (degree) at 0K and averaged from MD trajectories at 300K in pristine and defective systems.

|                 | Pb-I bond length<br>(0K) | Pb-I-Pb angle<br>(0K) | Pb-I bond length<br>(300K) | Pb-I-Pb angle<br>(300K) |
|-----------------|--------------------------|-----------------------|----------------------------|-------------------------|
| Pristine        | 3.210                    | 155.74                | 3.186                      | 157.99                  |
| Pb <sub>v</sub> | 3.214                    | 156.25                | 3.187                      | 158.75                  |

**Table S2.** The root-mean-square (RMS) displacement (Å) of each atomic species in pristine and defective MAPbI<sub>3</sub> obtained by averaging over 3 ps trajectories at 300 K.

|                 | C        | N      | H       | Pb       | I        |
|-----------------|----------|--------|---------|----------|----------|
| Pristine        | 0.006902 | 0.0066 | 0.01545 | 0.002205 | 0.002777 |
| Pb <sub>v</sub> | 0.006924 | 0.0069 | 0.01736 | 0.002200 | 0.002682 |

**Table S3.** Charge density distribution of CB states with excess energy  $\Delta E_c \leq 0.5$  eV in pristine MAPbI<sub>3</sub>.

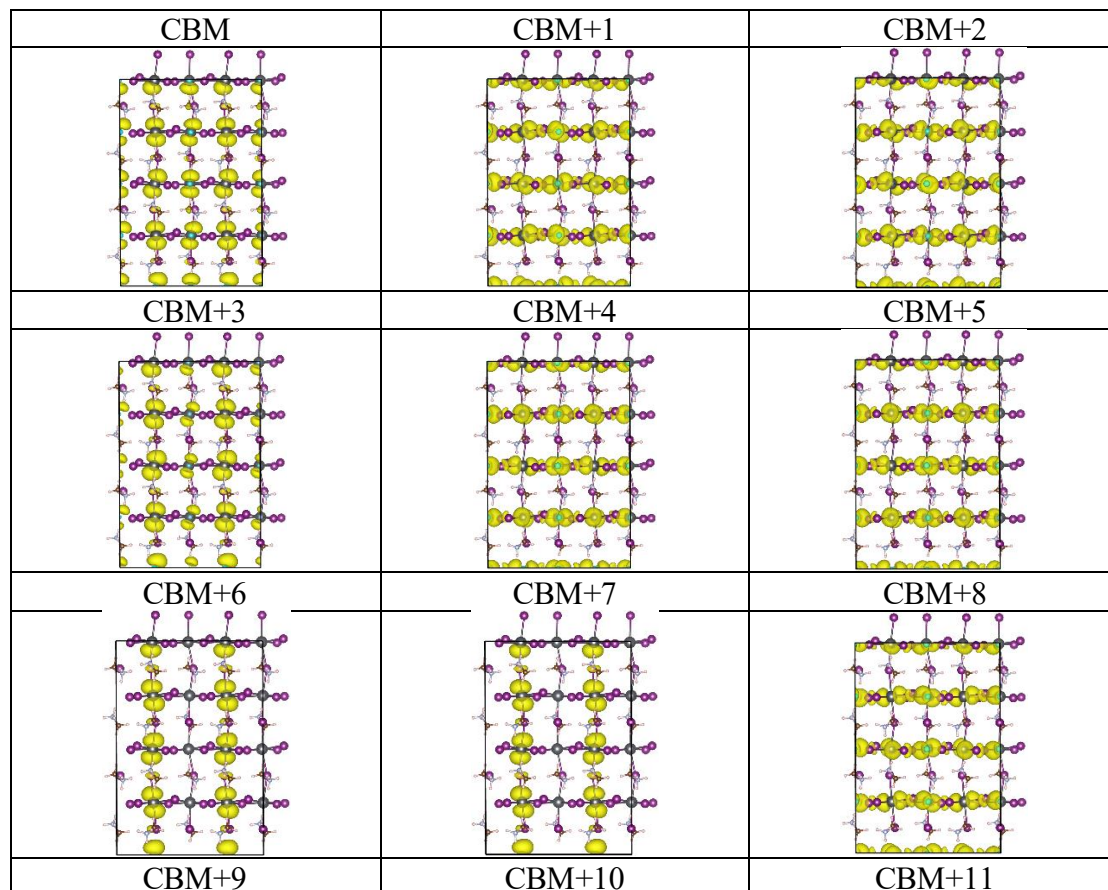

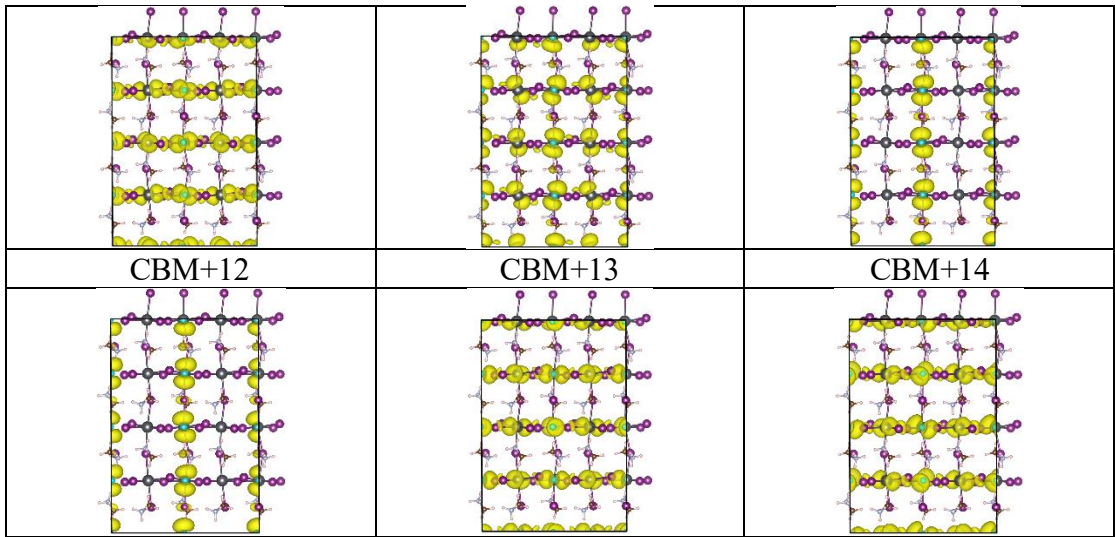

**Table S4.** Charge density distribution of VB states with excess energy  $\Delta E_h \leq 0.5$  eV in pristine MAPbI<sub>3</sub>.

|        |        |        |
|--------|--------|--------|
| VBM    | VBM-1  | VBM-2  |
|        |        |        |
| VBM-3  | VBM-4  | VBM-5  |
|        |        |        |
| VBM-6  | VBM-7  | VBM-8  |
|        |        |        |
| VBM-9  | VBM-10 | VBM-11 |
|        |        |        |
| VBM-12 | VBM-13 | VBM-14 |
|        |        |        |
| VBM-15 | VBM-16 | VBM-17 |
|        |        |        |
| VBM-18 | VBM-19 | VBM-20 |
|        |        |        |

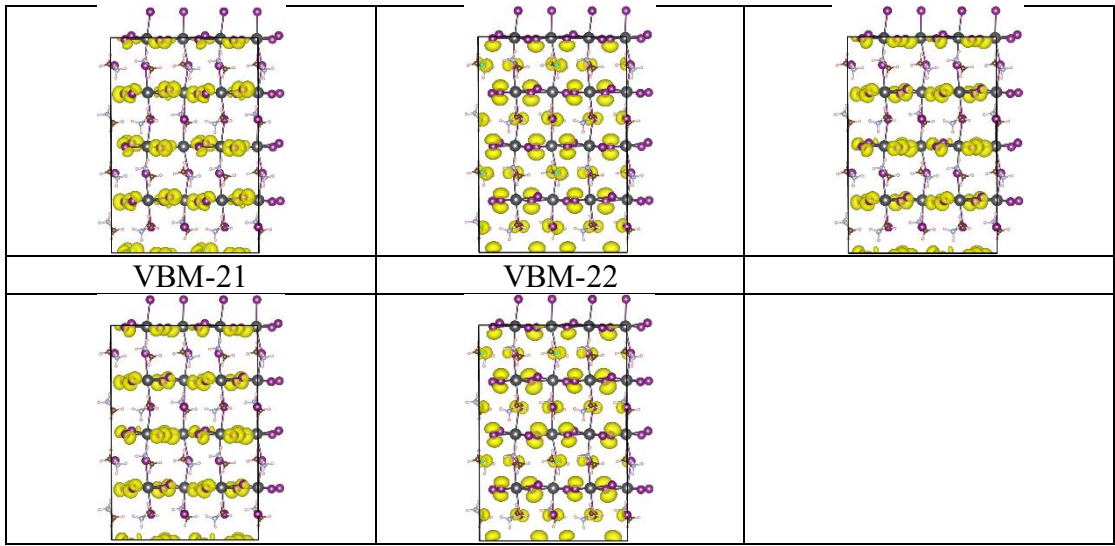

**Table S5.** Charge density distribution of CB states with excess energy  $\Delta E_c \leq 0.5$  eV in the  $\text{Pb}_V$  system.

|                                                                                     |                                                                                     |                                                                                       |
|-------------------------------------------------------------------------------------|-------------------------------------------------------------------------------------|---------------------------------------------------------------------------------------|
| CBM                                                                                 | CBM+1                                                                               | CBM+2                                                                                 |
| 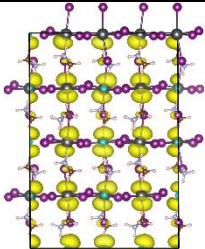   |    |    |
| CBM+3                                                                               | CBM+4                                                                               | CBM+5                                                                                 |
|    |    |    |
| CBM+6                                                                               | CBM+7                                                                               | CBM+8                                                                                 |
|   |   |   |
| CBM+9                                                                               | CBM+10                                                                              | CBM+11                                                                                |
|  |  |  |
| CBM+12                                                                              | CBM+13                                                                              |                                                                                       |
|  |  |                                                                                       |

**Table S6.** Charge density distribution of VB states with excess energy  $\Delta E_h \leq 0.5$  eV in the  $\text{Pb}_V$  system.

|                                                                                     |                                                                                     |                                                                                       |
|-------------------------------------------------------------------------------------|-------------------------------------------------------------------------------------|---------------------------------------------------------------------------------------|
| VBM                                                                                 | VBM-1                                                                               | VBM-2                                                                                 |
| 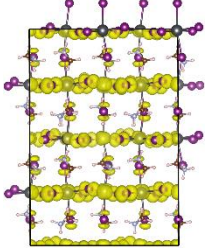   |    |    |
| VBM-3                                                                               | VBM-4                                                                               | VBM-5                                                                                 |
|    |    |    |
| VBM-6                                                                               | VBM-7                                                                               | VBM-8                                                                                 |
|   |   |   |
| VBM-9                                                                               | VBM-10                                                                              | VBM-11                                                                                |
|  |  |  |
| VBM-12                                                                              | VBM-13                                                                              | VBM-14                                                                                |
|  |  |  |
| VBM-15                                                                              | VBM-16                                                                              | VBM-17                                                                                |
|  |  |  |
| VBM-18                                                                              | VBM-19                                                                              | VBM-20                                                                                |
|  |  |  |



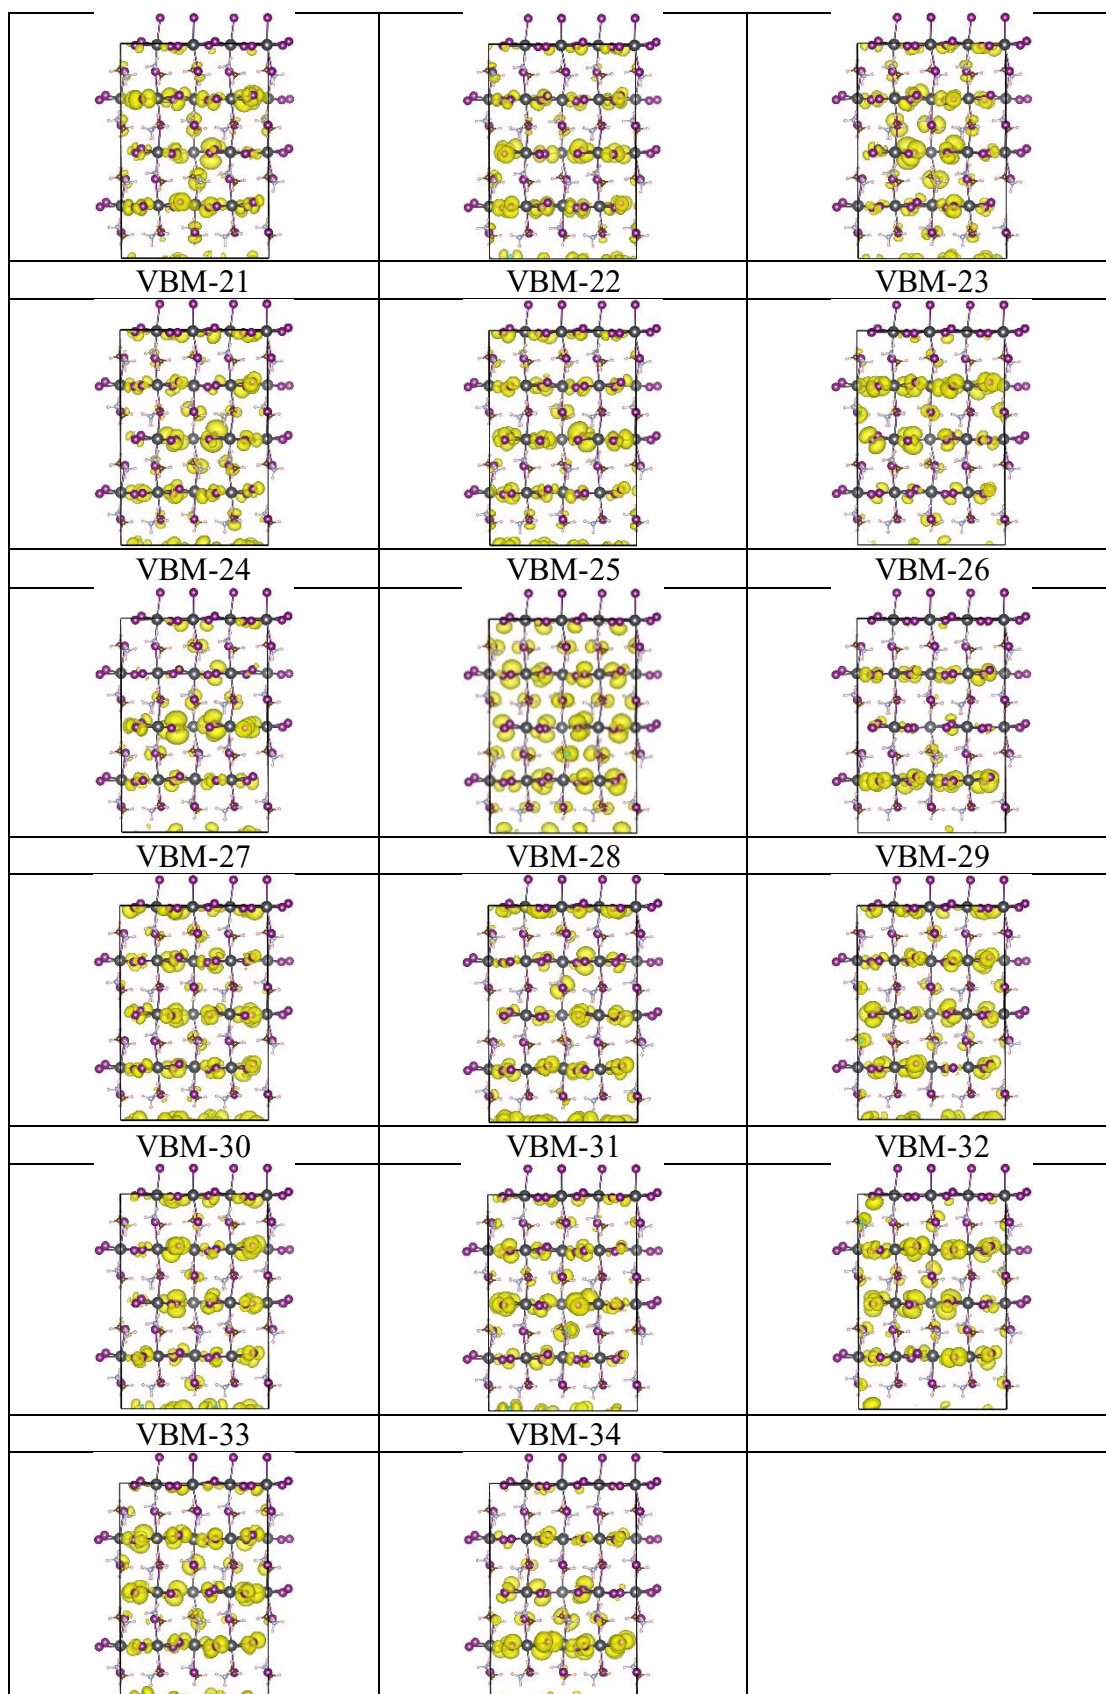

**Table S7.** Excited state populations of hot electrons with  $\Delta E_e \leq 0.5$  eV for pristine MAPbI<sub>3</sub>.

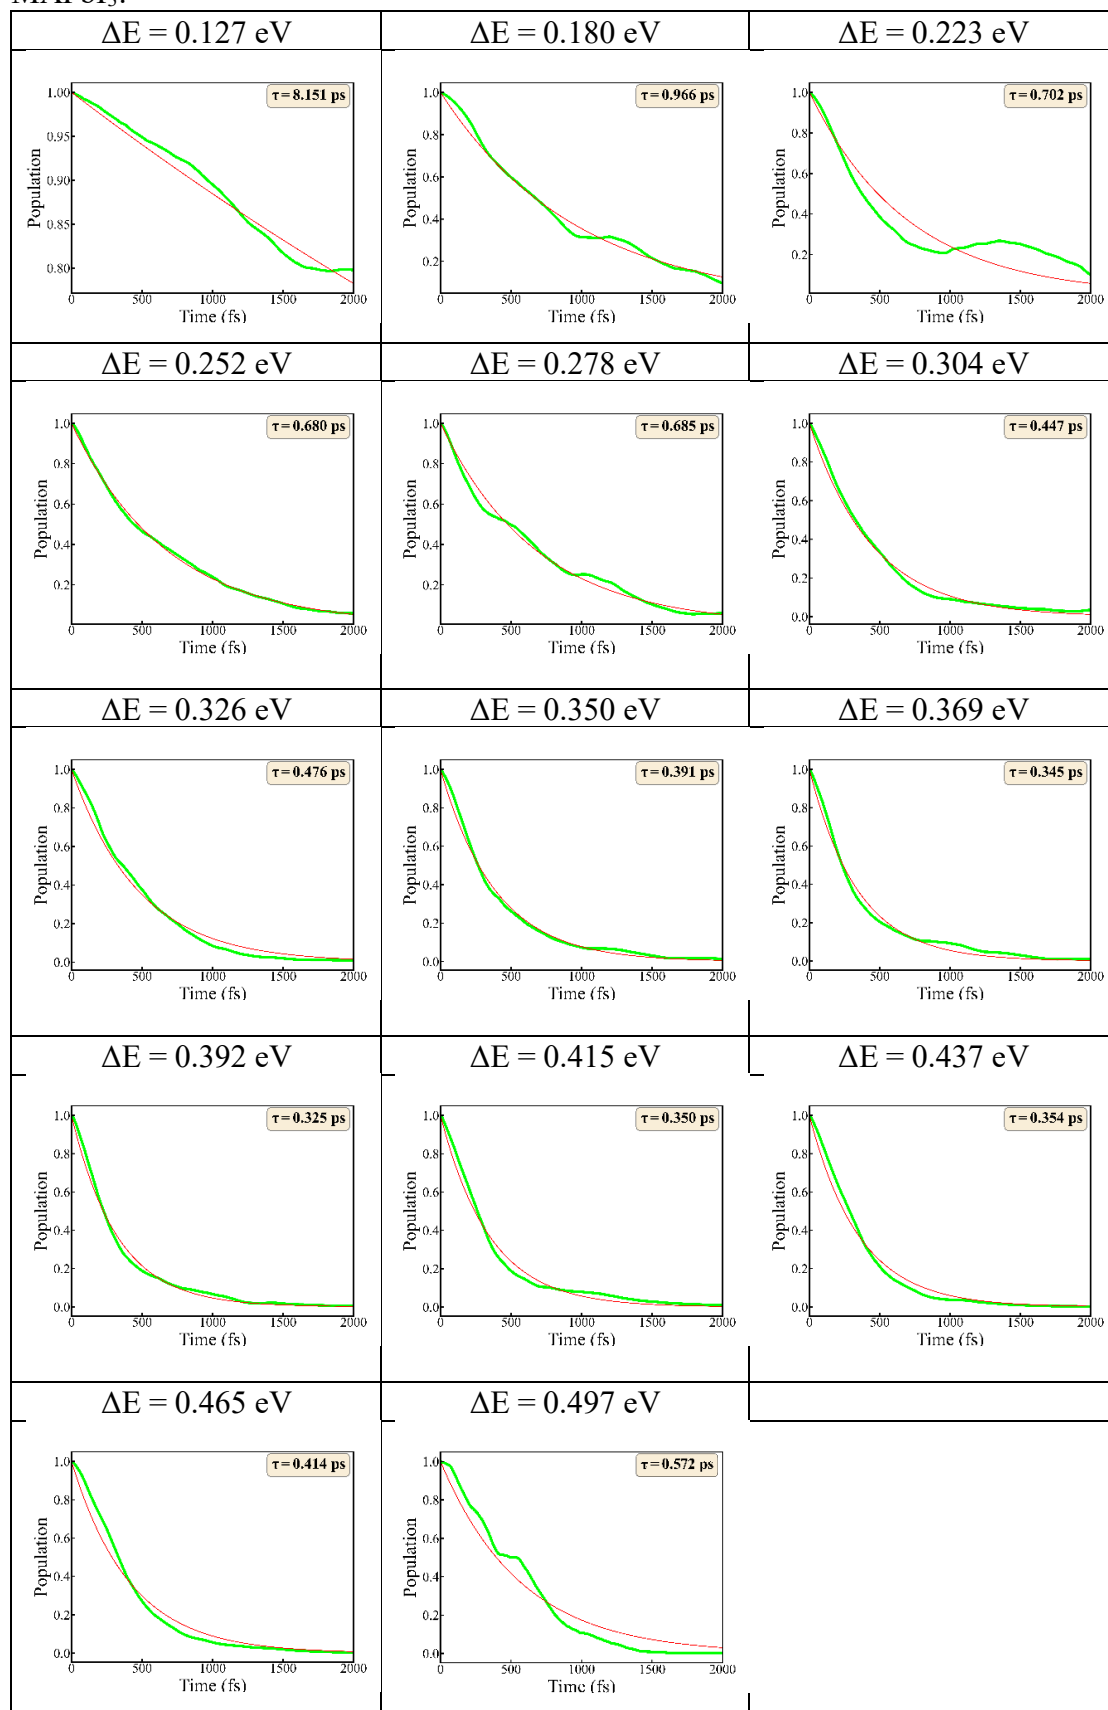

**Table S8.** Excited state populations of hot holes with  $\Delta E_h \leq 0.5$  eV for pristine MAPbI<sub>3</sub>.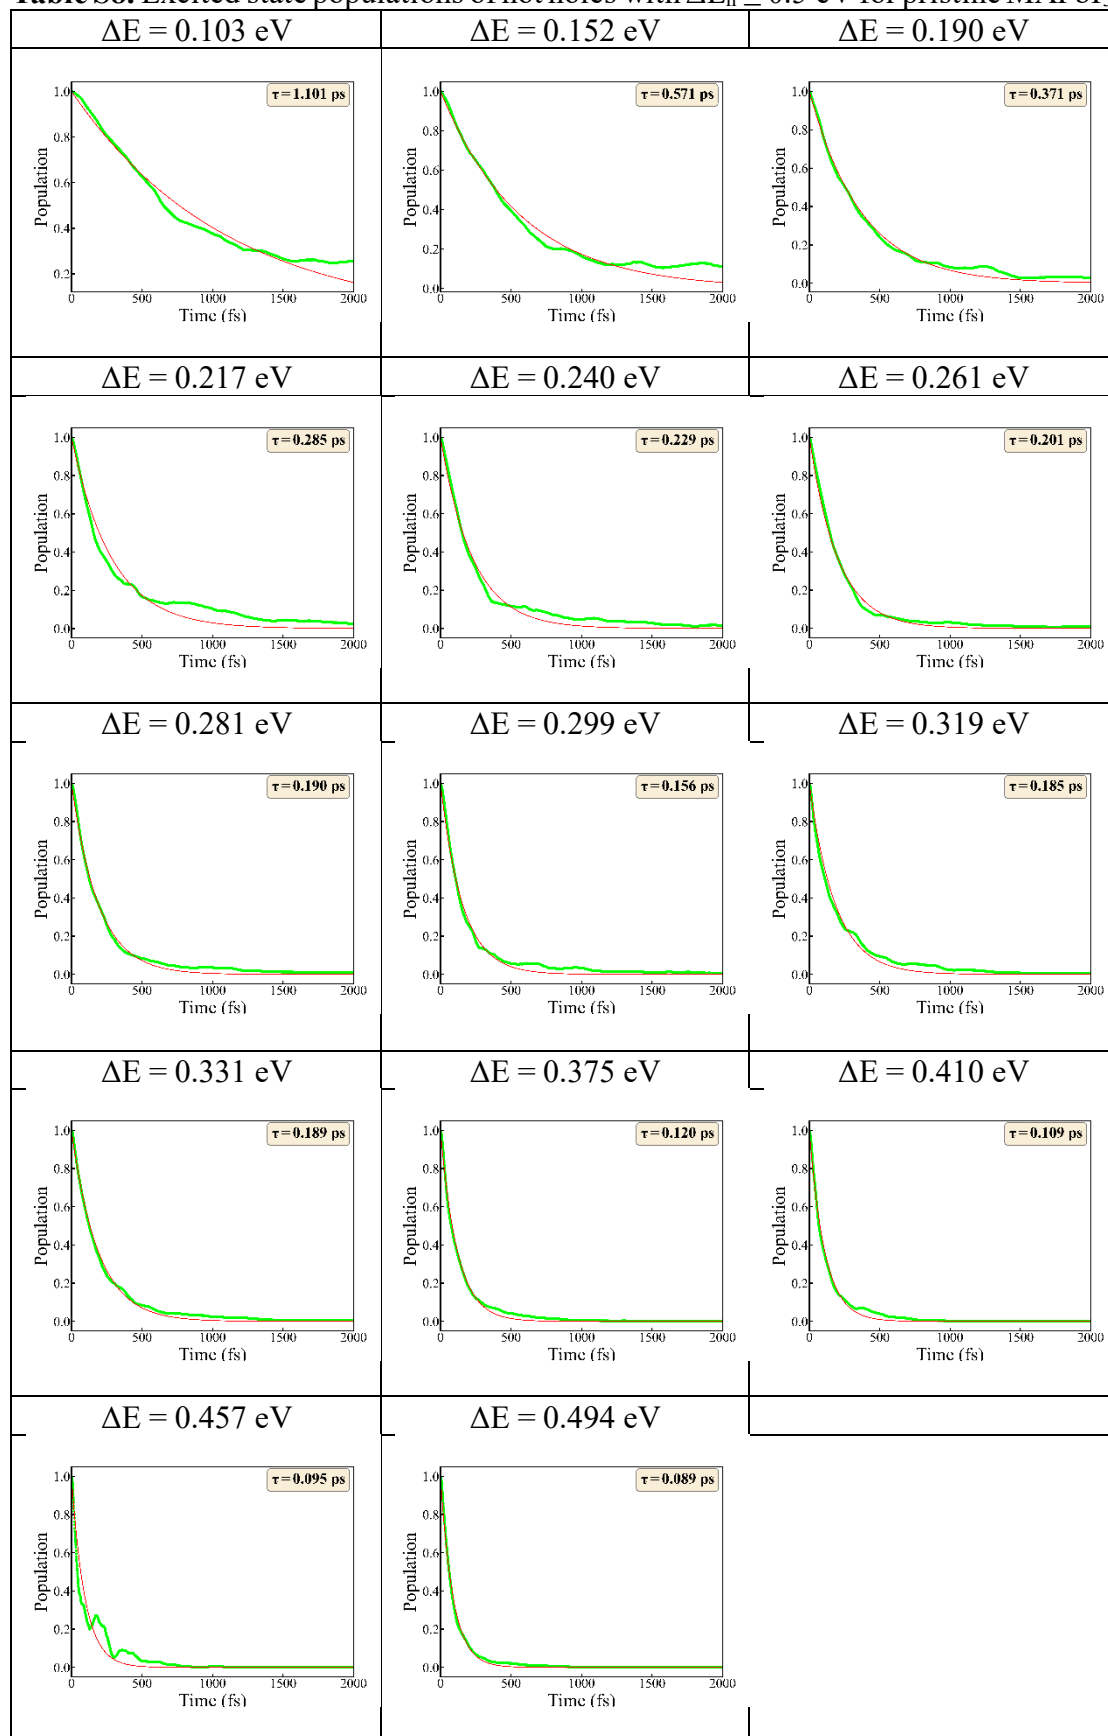

**Table S9.** Excited state populations of hot electrons with  $\Delta E_e \leq 0.5$  eV for MAPbI<sub>3</sub> with Pb<sub>v</sub>.

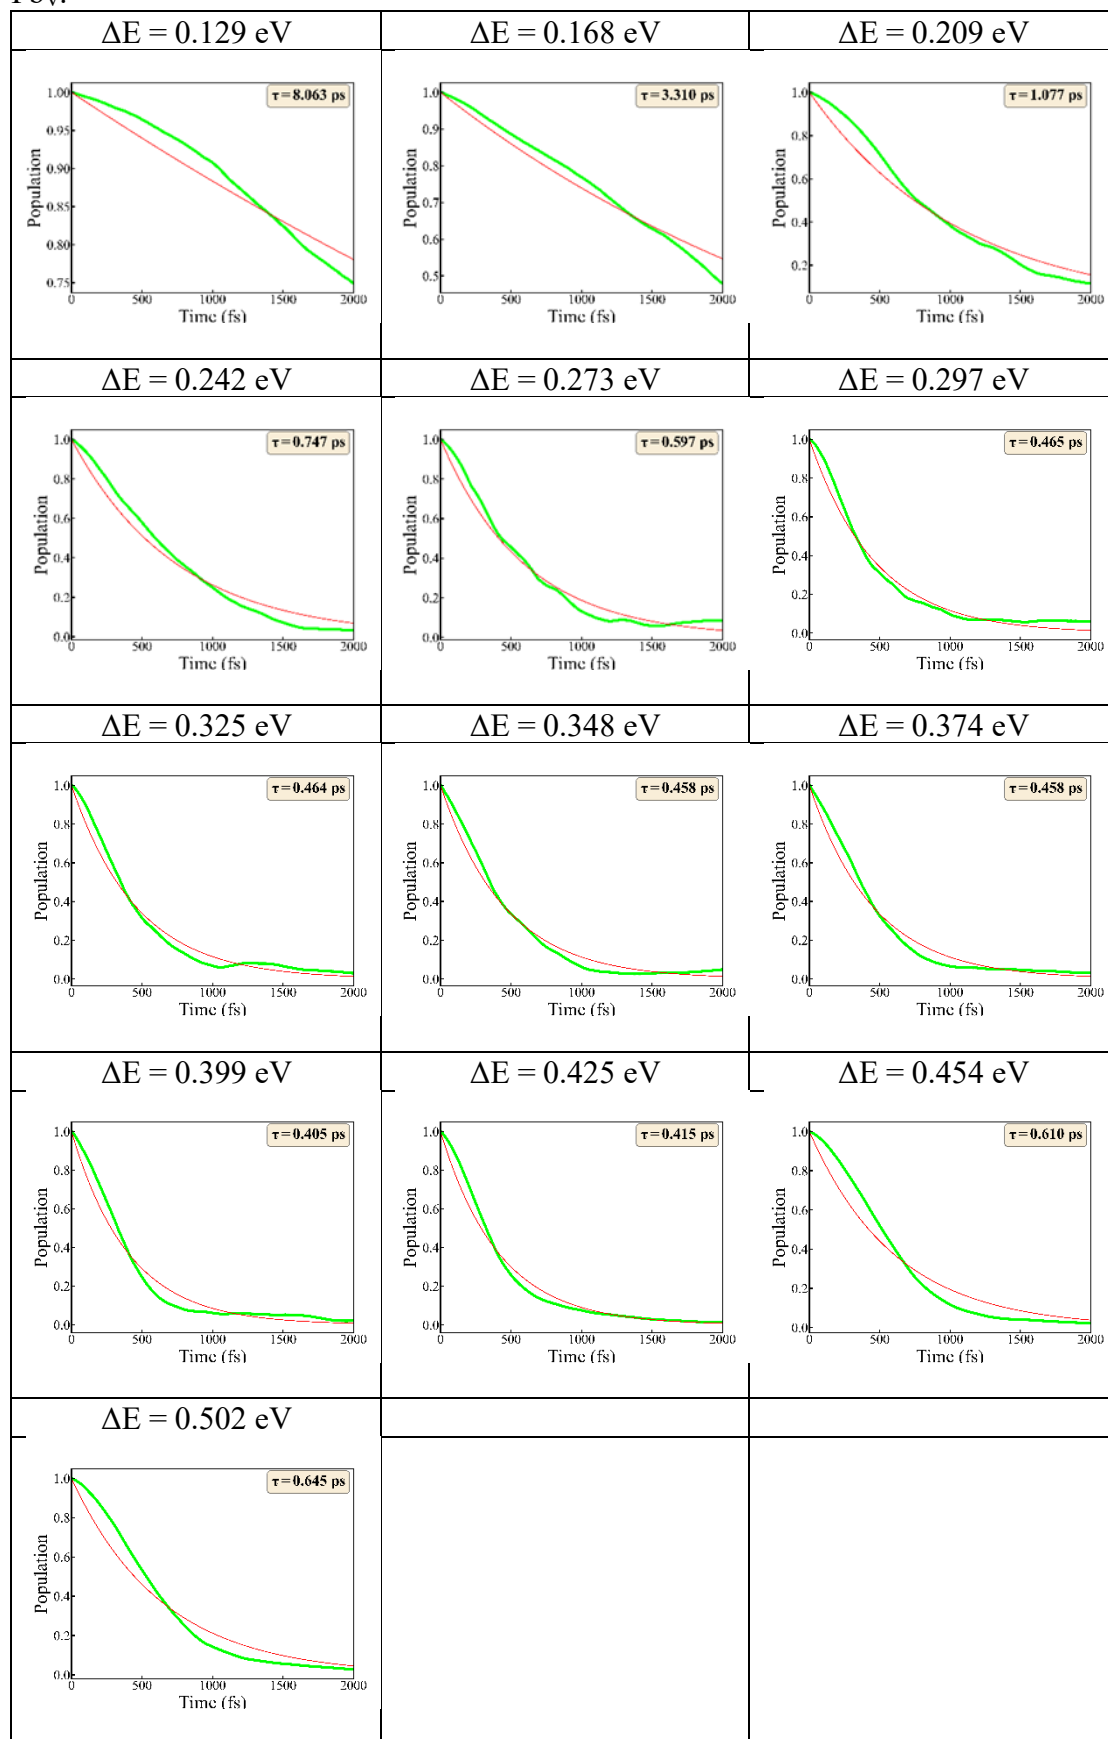

**Table S10.** Excited state populations of hot holes with  $\Delta E_h \leq 0.5$  eV for MAPbI<sub>3</sub> with Pb<sub>v</sub>.

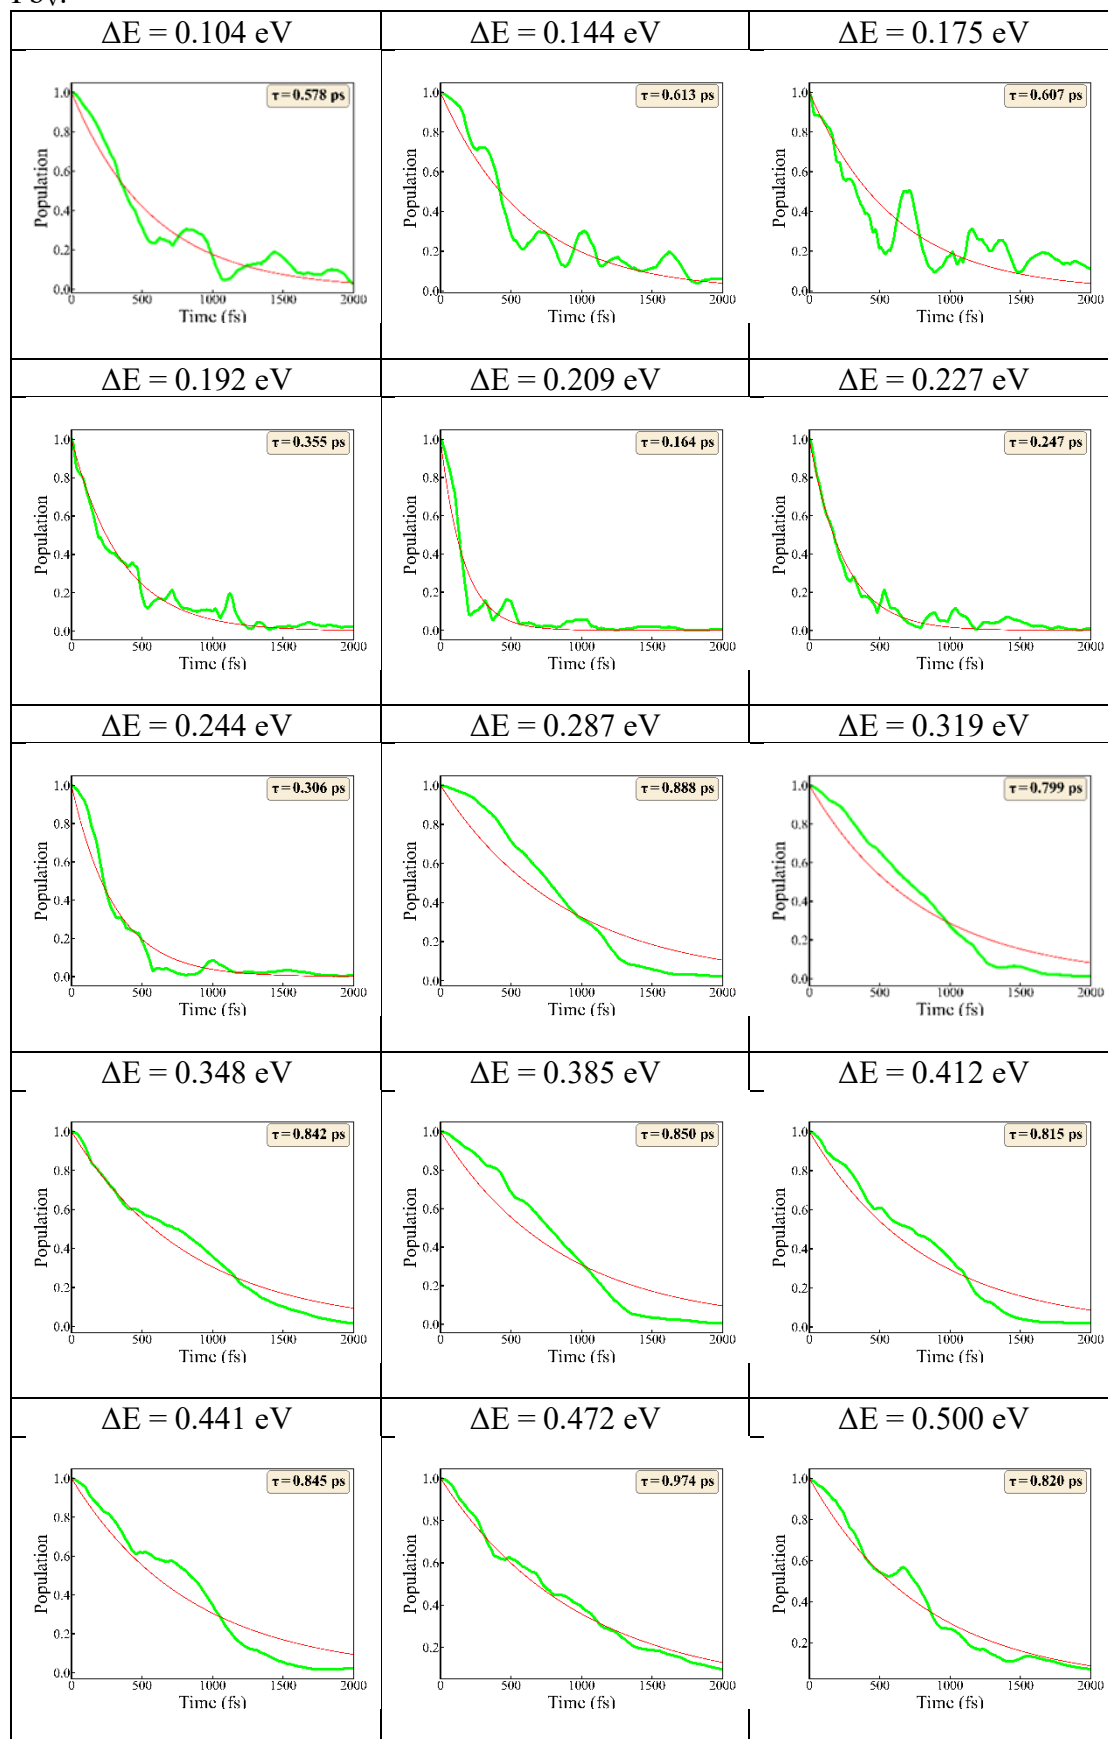

Supplement: d4qi00833b1.pdf [file d4qi00833b1.pdf]
